# Supplementary material for: YAP increases response to Trastuzumab in HER2-positive Breast Cancer by enhancing P73-induced apoptosis
Source: PubMed Central journal article supplement (PMC7545685; doi:10.7150/jca.48535), 2020-09-25
Supplement: jcav11p6748s1.pdf [file jcav11p6748s1.pdf]

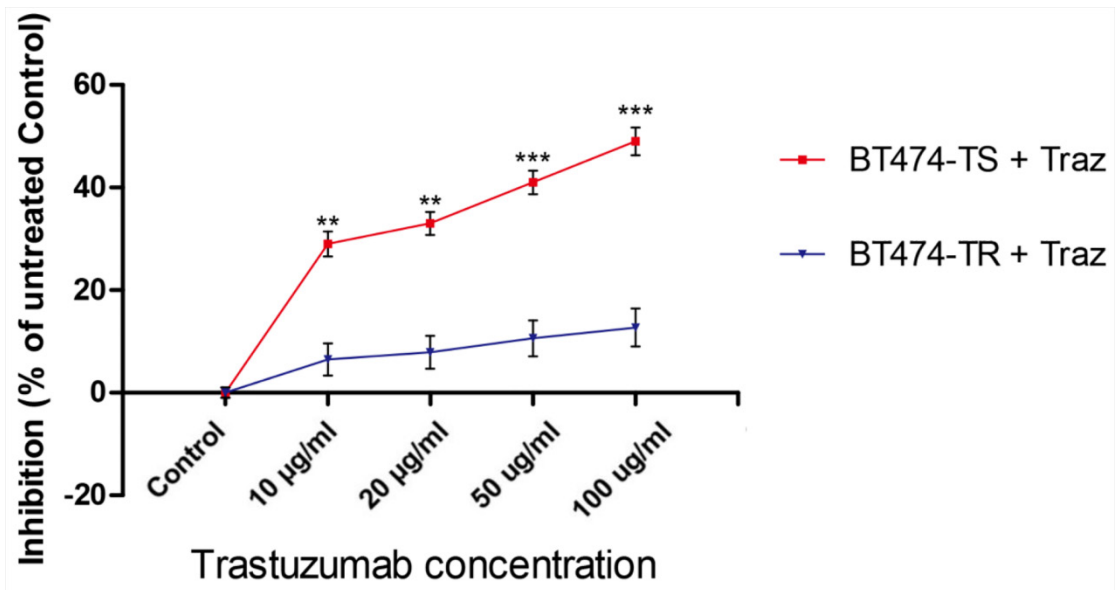

1

2 **Fig. S1.** Inhibition of cell viability by trastuzumab, as measured by cell counting kit-8

3 assay, occurred in a dose-dependent manner 4 days following treatment with

4 trastuzumab at five different concentrations. Data are presented as mean  $\pm$  standard

5 deviation (SD). The data shown are representative of three independent experiments.

6 \*\*\* $p < 0.001$ , \*\* $p < 0.01$ .

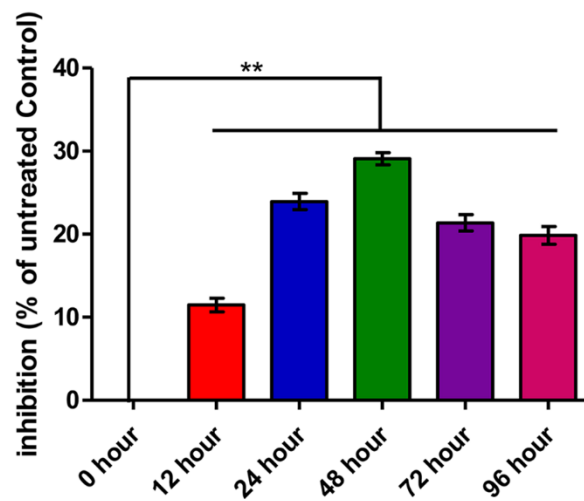

7

8 **Fig. S2.** Trastuzumab (10 µg/mL) inhibited cell viability in a time-dependent manner.

9 Data are presented as mean ± standard deviation (SD). The data shown are

10 representative of three independent experiments. \*\* $p < 0.01$ .

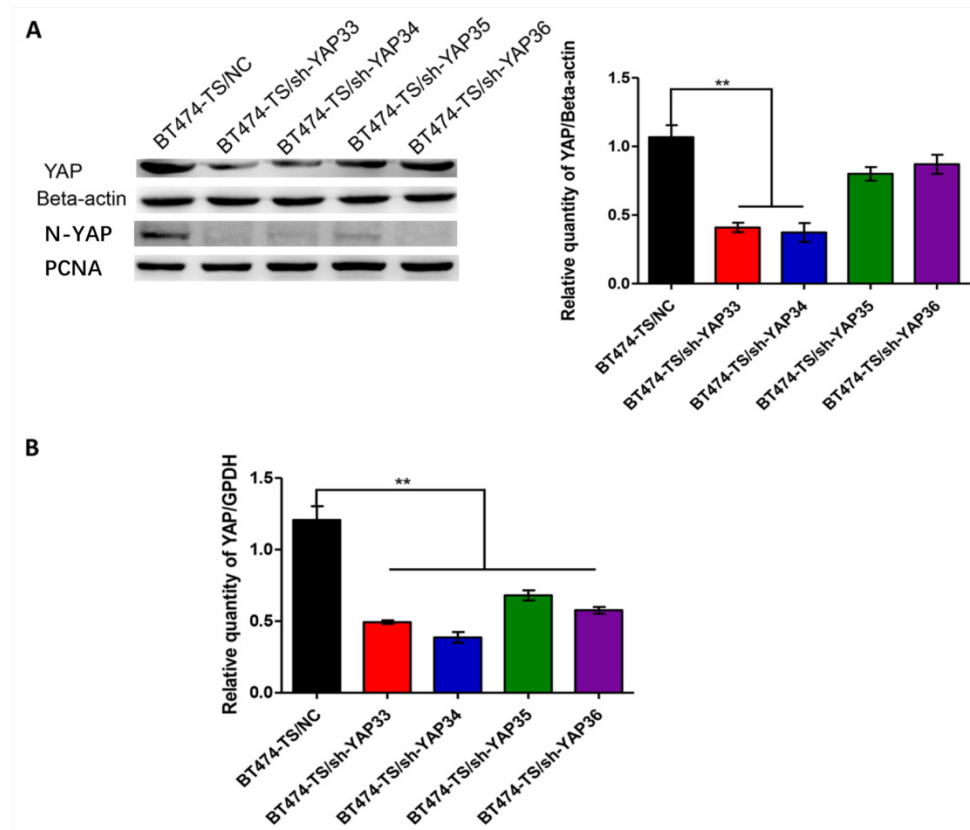

11

12 **Fig. S3.** YAP knockdown. (A) YAP protein and N-YAP expression were detected,  
 13 using western blotting, in BT474-TS cells. (B) YAP mRNA levels detected, by  
 14 RT-PCR, in BT474-TS cells. Data are presented as mean  $\pm$  standard deviation (SD).  
 15 The data shown are representative results of three independent experiments.  $**p <$   
 16 0.01.

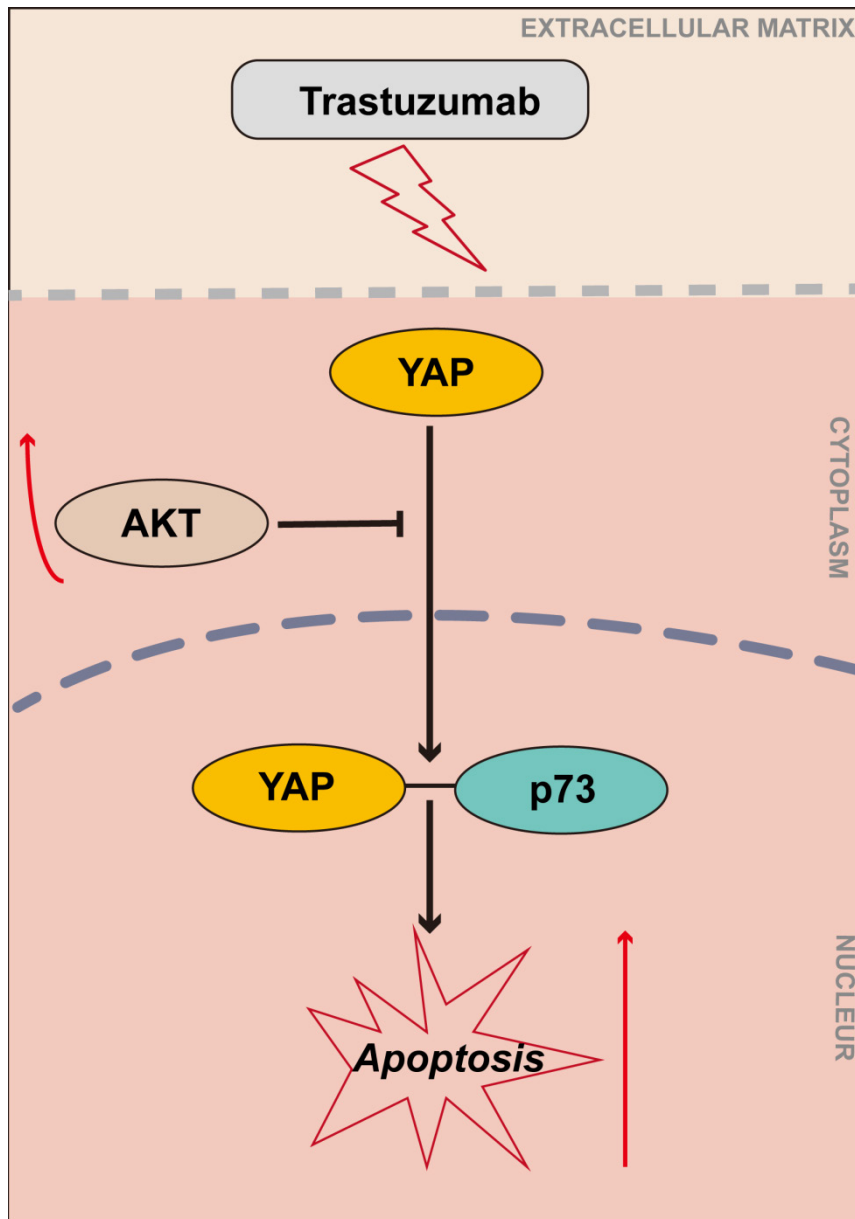

17

18 **Fig. S4.** Study hypothesis: AKT attenuates p73-mediated apoptosis by  
19 phosphorylating YAP.

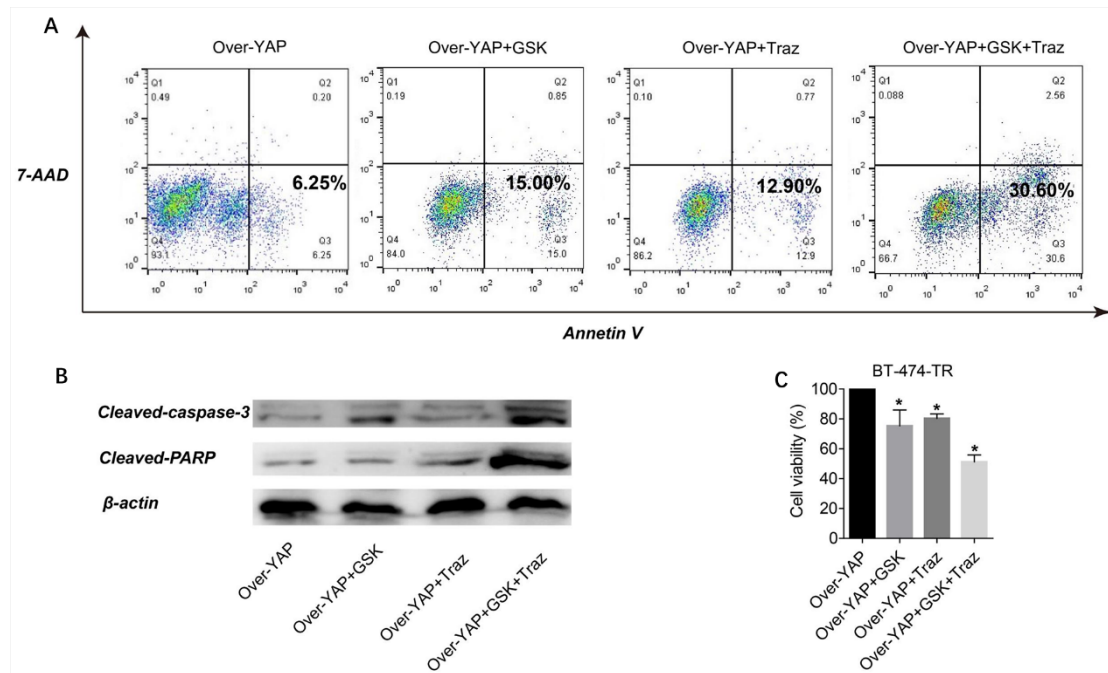

20

21 **Fig. S5.** Combination treatment of AKT inhibitor (GSK) and trastuzumab of  
 22 YAP-over BT474-TR cells. (A) Trastuzumab plus GSK increased apoptosis rate of  
 23 BT474-TR cells. (B) Expression of apoptotic proteins was examined using western  
 24 blotting. (C) Trastuzumab plus GSK strongly affected the viability of BT474-TR cells  
 25 after YAP-overexpression. Data are presented as mean  $\pm$  standard deviation (SD). The  
 26 data shown are representative of three independent experiments. \* $p < 0.05$ .

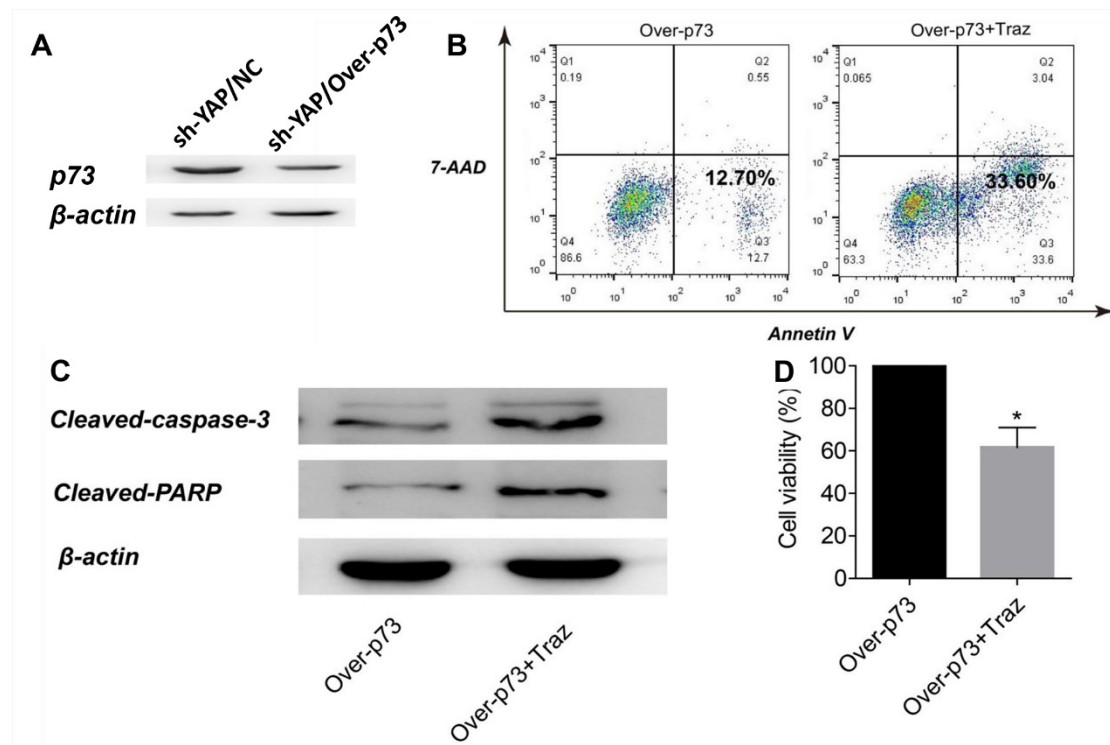

27

28 **Fig. S6.** p73-overexpression altered trastuzumab treatment effects in YAP-silenced

29 BT474-TS cells. (A) p73 protein expression was detected, by western blotting, in

30 YAP-silenced BT474-TS cells. (B) p73-overexpression altered apoptosis, measured

31 by flow cytometry, following treatment of YAP-silenced BT474-TS cells. (C)

32 Expression of apoptotic proteins was examined by western blotting. (D)

33 p73-overexpression decreased the viability of YAP-silenced BT474-TS cells after

34 trastuzumab treatment; Data are presented as mean  $\pm$  standard deviation (SD). The

35 data shown are representative of three independent experiments. \* $p < 0.05$ .

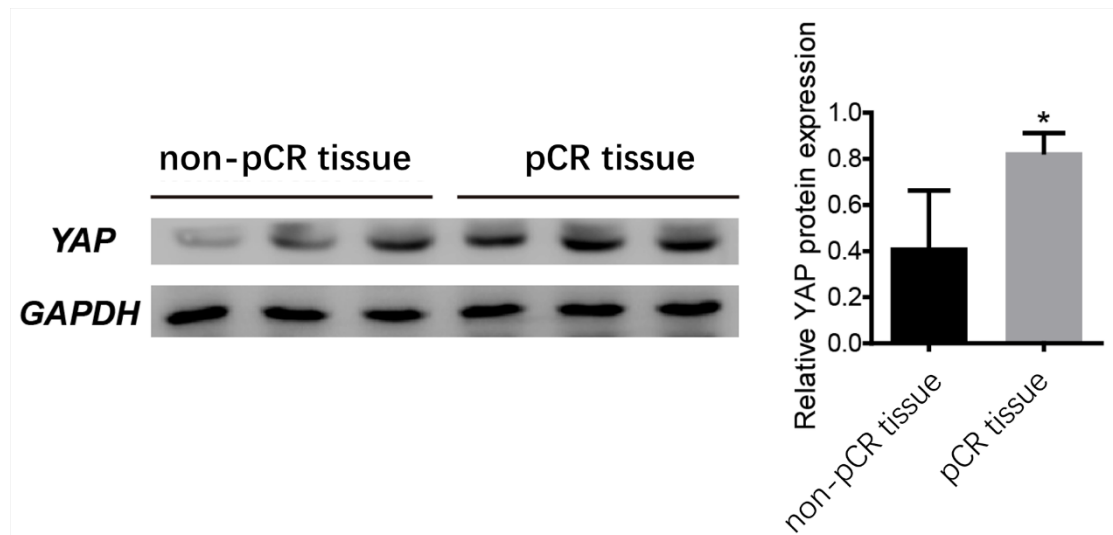

36

37 **Fig. S7.** YAP expression in breast cancer tissues. YAP protein expression was detected,  
38 by western blot, in pCR and non-pCR breast cancer tissues. Data are presented as  
39 mean  $\pm$  standard deviation (SD). The data shown are representative of three  
40 independent experiments. \* $p < 0.05$ .

**Table S1.** Association between YAP and p73, AKT, and p-AKT in pre-treatment biopsy tissues

|      |       |          | No. | YAP                               |                                   | <i>p</i> -value |
|------|-------|----------|-----|-----------------------------------|-----------------------------------|-----------------|
|      |       |          |     | <i>Negative</i><br><i>No. (%)</i> | <i>Positive</i><br><i>No. (%)</i> |                 |
| TAC  | p73   | negative | 9   | 7 (77.8)                          | 2 (22.2)                          | 0.049           |
|      |       | positive | 14  | 5 (35.7)                          | 9 (64.3)                          |                 |
|      | AKT   | negative | 4   | 1 (25.0)                          | 3 (75.0)                          | 0.291           |
|      |       | positive | 19  | 11 (60.0)                         | 8 (40.0)                          |                 |
|      | p-AKT | negative | 7   | 1 (14.3)                          | 6 (85.7)                          | 0.016           |
|      |       | positive | 16  | 11 (68.8)                         | 5 (31.2)                          |                 |
| TCbH | p73   | negative | 6   | 6 (100)                           | 0 (0)                             | 0.001           |
|      |       | positive | 8   | 1 (12.5)                          | 7 (87.5)                          |                 |
|      | AKT   | negative | 3   | 0 (0)                             | 3 (100)                           | 0.051           |
|      |       | positive | 11  | 7 (63.6)                          | 4 (36.4)                          |                 |
|      | p-AKT | negative | 7   | 0 (0)                             | 7 (100)                           | < 0.001         |
|      |       | positive | 7   | 7 (100)                           | 0 (0)                             |                 |



**Table S2.** Association between YAP and p73, AKT, and p-AKT in post-treatment surgical tissues

|      |       |          | No. | YAP                               |                                   | <i>p</i> -value |
|------|-------|----------|-----|-----------------------------------|-----------------------------------|-----------------|
|      |       |          |     | <i>Negative</i><br><i>No. (%)</i> | <i>Positive</i><br><i>No. (%)</i> |                 |
| TAC  | p73   | negative | 6   | 5 (83.3)                          | 1 (16.7)                          | 0.095           |
|      |       | positive | 14  | 6 (42.9)                          | 8 (57.1)                          |                 |
|      | AKT   | negative | 10  | 3 (30.0)                          | 7 (70.0)                          | 0.133           |
|      |       | positive | 13  | 8 (61.5)                          | 5 (38.5)                          |                 |
|      | p-AKT | negative | 12  | 3 (25.0)                          | 9 (75.0)                          | 0.001           |
|      |       | positive | 8   | 8 (100)                           | 0 (0)                             |                 |
| TCbH | p73   | negative | 4   | 4 (100)                           | 0 (0)                             | 0.002           |
|      |       | positive | 6   | 0 (0)                             | 6 (100)                           |                 |
|      | AKT   | negative | 3   | 0 (0)                             | 3 (100)                           | 0.091           |
|      |       | positive | 7   | 4 (57.1)                          | 3 (42.9)                          |                 |
|      | p-AKT | negative | 6   | 0 (0)                             | 6 (100)                           | 0.002           |
|      |       | positive | 4   | 4 (100)                           | 0 (0)                             |                 |
